# Supplementary material for: A single-center retrospective study of ectopic lymphoid tissues in idiopathic membranous nephropathy: clinical pathological characteristics and prognostic value
Source: PeerJ. 2024 Dec 9;12:e18703. doi: 10.7717/peerj.18703 (PMC11636532; doi:10.7717/peerj.18703)
Supplement: Supplemental Information 1 [file peerj-12-18703-s001.xlsx]

## Sheet: dataset
ELT grading	Gender(1:male;2:female)	Age(years)	Hypertension(1:yes;0:no)	Diabetes mellitus(1:yes;0:no)	Nephrotic syndrome(1:yes;0:no)	Hemoglobin(g/L)	Serum albumin(g/L)	Total cholesterol(mmol/L)	Triglyceride(mmol/L)	Uric acid(µmol/L)	SCr(µmol/L)	eGFR(ml/min/1.73 m2)	Proteinuria(g/24h)	Microscopic hematuria(1:yes;0:no)	Serum PLA2R positivity(1:yes;0:no)	Serum IgG(g/L)	Serum C3(g/L)	Glomerulosclerosis(1:yes;0:no)	Tubular atrophy(1:≥25%,0:＜25%)	Interstitial fibrosis(1:≥25%,0:＜25%)	Interstitial inflammatory cell infiltration(1:≥25%,0:＜25%)	Arteriolar lesions(1:yes;0:no)	Crescent lesions(1:yes;0:no)	Chronicity index(score)	PLA2R deposition(1:yes;0:no)	IgG deposition(1:yes;0:no)	C3 deposition(1:yes;0:no)	C1q deposition(1:yes;0:no)	Glucocorticoids(1:yes;0:no)	immunosuppressants(0:no;1:CTX;2:CNIs;3:Others)	immunosuppressant therapy(1:yes;0:no)	RAAS inhibitors(1:yes;0:no)	Anticoagulants(1:yes;0:no)	lipid-regulating drugs(1:yes;0:no)	Diuretics(1:yes;0:no)	Treatment response at 6 months(1:non-remission;2:partial remission;3:complete remission)	Treatment response at 6 months(1:non-remission;0:total remission)	Follow-up time(months)	ESRD(1:yes;0:no)	Doubling of SCr(1:yes;0:no)	Use of rituximab during follow up(1:yes;0:no)	Treatment response of rituximab after 6 months(1:total remission;0:non-remission)
G2	1	61	1	0	1	102	22.8	5.27	2.13	315	80	92.66	10.66	1	1	5.68	1.18	1	1	0	0	0	0	0	1	1	1	0	0	2	1	1	1	1	1	1	1	9	0	1	1	0
G3	1	40	0	0	1	114	18.5	11.72	2.51	241.6	106.5	74.83	9.18	1	1	2.32	0.72	1	1	0	0	0	0	0	0	1	1	0	1	2	1	1	1	1	1	1	1	14	1	0	1	0
G1	2	23	0	0	0	145	29.2	7.71	1.41	318.9	51.2	130.4	3.38	0	0	9.07	0.82	0	0	0	0	0	0	0	1	1	1	1	0	0	0	1	1	1	0	1	1	31	0	0	1	1
G1	1	34	0	0	1	122	25.5	5.09	1.45	415.6	62.8	122.38	4.93	1	1	10.3	0.66	0	0	0	0	1	0	0	1	1	1	0	0	2	1	1	1	1	0	1	1	29	0	0	1	1
G4	1	65	0	0	1	86	28.5	7.77	0.99	258	100.4	67.42	5.74	1	0	6.13	1.43	0	0	0	0	0	0	0	0	1	1	0	0	0	0	1	1	1	0	1	1	6	0	0	0
G3	1	52	0	0	0	130	20	4.93	1.02	390.8	69.9	103.2	2.55	1	1	7.53	0.61	0	0	0	0	0	0	0	1	1	1	0	1	2	1	1	1	1	1	3	0	30	0	0	0
G4	1	53	1	0	1	155	21.8	8.54	3.63	520.7	84.3	90.6	12.31	1	0	9.72	0.94	0	1	1	1	1	0	0	1	1	0	0	1	1	1	1	1	1	0	1	1	29	0	0	0
G3	1	62	0	0	1	146	19.8	7.34	1.56	466.9	63.3	100.2	10.64	1	1	3.79	0.75	0	0	0	0	1	0	0	1	1	1	1	1	2	1	1	1	1	0	2	0	15	0	1	0
G3	1	72	1	0	0	137	29.1	4.59	0.82	368	128	47.85	1.14	1	0	5.03	0.96	0	0	0	0	1	0	0	1	1	1	0	1	3	1	0	1	1	0	3	0	33	0	0	0
G2	1	56	1	0	1	146	29.2	3.14	0.97	325.9	75.7	97.11	3.63	1	1	10.1	0.92	1	0	0	0	1	0	0	1	1	1	1	0	0	0	1	0	1	0	1	1	27	0	0	0
G2	1	70	1	1	0	119	30.5	6.2	2.36	360.2	95.2	69.41	5.8	1	1	5.53	0.74	0	0	0	0	1	1	1	1	1	1	0	1	3	1	1	1	1	1	1	1	16	0	1	0
G3	2	80	1	0	0	117	36.1	3.92	1.52	480	64	78.82	0.44	0	0	12.2	0.95	1	0	0	0	1	0	0	1	1	1	0	0	0	0	1	0	0	1	1	1	12	0	0	0
G1	2	46	0	0	0	136	26.1	7.27	2.59	300.8	33.7	127.31	2.24	0	0	7.56	1.03	1	0	0	0	0	0	0	1	1	1	0	1	2	1	1	0	1	0	2	0	20	0	0	0
G4	1	43	0	0	1	140	21	13.53	2.5	381.6	90.3	89.44	13.12	1	1	4.69	0.78	1	0	0	0	0	0	0	1	1	1	0	0	2	1	1	0	1	0	1	1	29	0	0	0
G1	1	51	0	0	1	133	20.7	9.62	5.53	362.1	64.3	107.56	11.53	1	1	2.62	1	0	0	0	0	1	0	0	0	1	0	0	1	1	1	0	1	1	0	1	1	11	0	0	0
G4	2	65	0	0	1	122	29.9	5.99	2.03	280.8	52.4	96.34	5.95	1	1	9.56	0.88	1	0	0	0	1	0	0	1	1	1	0	1	1	1	1	1	1	0	1	1	32	0	0	0
G1	1	65	0	0	0	122	20.7	6.91	1.2	495.3	105.9	63.21	3.39	1	1	6.94	0.8	1	0	0	0	0	0	0	1	1	1	0	1	2	1	1	1	1	1	2	0	27	0	0	0
G2	1	44	0	0	1	157	15.5	10.49	6.03	497.3	61.8	114.84	6.9	1	1	5.65	0.72	1	0	0	0	0	0	0	1	1	1	0	1	0	0	0	1	1	1	2	0	29	0	0	1	1
G4	2	58	1	0	0	106	23.3	7.68	1.24	253.7	65.4	89.61	1.19	0	1	10.3	1.21	1	0	0	0	0	0	0	1	1	1	1	0	0	0	1	1	1	1	1	1	30	0	0	0
G2	1	67	1	0	1	122	23.4	7.28	3.06	337.4	112.7	57.81	5.49	1	1	3.9	0.91	1	0	0	0	0	0	0	1	1	1	1	0	2	1	1	1	1	1	2	0	19	0	0	0
G2	2	63	0	0	0	124	26.3	4.92	1.71	453	51.9	98.02	1.77	0	1	5.29	0.84	0	0	0	0	1	0	0	1	1	1	1	0	2	1	1	1	1	0	2	0	28	0	0	0
G1	1	43	1	0	1	130	21.2	7.75	3.92	359.3	115.9	66.15	7.6	1	1	4.41	0.91	1	0	0	0	1	0	0	1	1	1	1	0	2	1	1	1	1	0	1	1	11	0	1	0
G1	1	34	0	0	0	132	38.1	5.53	1.34	427.4	71.3	116.16	0.7	0	1	9.51	1.23	0	0	0	0	0	0	0	1	1	0	0	0	0	0	1	0	0	0	3	0	25	0	0	0
G1	1	79	1	0	1	124	22.2	5.69	1.05	485.4	118.2	50.16	11.63	1	1	3.77	0.56	0	0	0	0	0	0	0	1	1	1	0	1	2	1	1	1	1	1	2	0	6	0	0	0
G3	2	78	1	1	1	94	14.9	8.04	2.89	472	206	25.81	6.61	1	1	6.33	0.63	0	1	1	1	1	0	0	1	1	1	0	1	1	1	0	1	1	1	2	0	30	0	0	0
G1	1	43	0	0	0	153	35.1	8.23	20.31	394.4	60	117.06	0.55	1	0	8.95	0.97	0	0	0	0	0	0	0	1	1	0	0	1	2	1	1	1	1	1	3	0	26	0	0	0
G1	1	39	0	0	0	139	26.3	4.01	0.75	372	72.5	111.38	2.64	1	0	12.3	0.65	1	0	0	0	0	1	1	0	1	1	1	1	2	1	1	0	1	1	2	0	23	0	0	0
G2	1	34	0	0	1	145	20.1	9.53	4.66	392.4	77.8	112.07	7.02	1	1	3.95	0.69	0	0	0	0	1	1	1	1	1	1	0	1	2	1	1	1	1	0	3	0	29	0	0	0
G3	1	35	1	0	1	130	28.3	6.15	3.1	370.1	125.2	63.74	7.72	1	1	5.37	0.8	1	1	1	1	1	0	0	1	1	1	1	1	2	1	1	1	1	0	2	0	29	0	0	1	1
G2	2	57	1	0	1	148	28	8.25	2.24	286.3	44.7	107.38	3.65	1	1	2.67	0.98	1	0	0	0	0	0	0	1	1	1	0	1	2	1	0	1	1	0	3	0	28	0	0	0
G2	1	30	0	0	1	135	24.3	7.06	3.96	390.3	67.3	122.34	12.64	1	0	5.59	0.95	1	0	0	0	0	0	0	1	1	1	0	1	2	1	1	0	1	1	2	0	24	0	0	0
G2	1	65	1	0	0	151	32.5	4.81	1.48	426.9	91.5	75.42	2.32	1	0	11	1.17	1	1	0	0	1	0	0	1	1	0	0	1	2	1	1	1	1	0	3	0	27	0	0	0
G2	1	54	1	0	1	133	20.7	6	1.87	321.6	76.6	98	6.18	1	1	6.25	0.83	1	0	0	0	1	0	0	1	1	1	0	1	2	1	1	1	1	0	1	1	24	0	0	0
G1	1	71	1	1	0	138	25	9.23	2.62	374.7	94.7	69.37	1.16	1	1	5.49	1.09	0	0	0	0	0	0	0	1	0	0	0	0	0	0	1	0	1	1	2	0	11	0	1	0
G4	2	44	0	0	1	118	23.7	6.2	0.77	281.1	43.9	118.35	4.37	1	1	8.03	1.09	0	0	0	0	0	0	0	1	1	0	0	1	2	1	1	1	1	0	1	1	15	0	0	0
G2	2	29	0	1	0	121	31.3	3.91	7.14	529.6	38.6	137.19	8.67	0	1	3.48	1.26	0	0	0	0	0	0	0	1	1	0	0	0	2	1	1	1	1	0	2	0	22	0	0	1	1
G4	2	57	0	0	0	114	31.2	4.31	3.37	454.8	49.6	103.77	2.35	0	1	5.04	1.14	1	0	0	0	1	0	0	1	1	1	0	1	3	1	1	0	1	0	2	0	26	0	0	0
G1	1	62	0	0	1	148	24.2	10.04	1.88	424.9	73	94.5	3.96	1	1	4.93	0.55	1	0	0	0	0	0	0	1	1	1	1	1	3	1	1	1	1	1	1	1	25	0	0	0
G2	2	78	1	0	0	114	24.2	5.93	1.77	83.69	60.9	83.69	0.95	0	0	6.86	0.95	1	0	0	0	1	0	0	1	1	0	0	1	3	1	1	1	1	1	1	1	6	0	0	0
G1	1	63	0	0	0	133	22.4	7.08	1.34	285.7	66.4	97.57	0.15	0	0	7.18	0.51	0	0	0	0	0	0	0	0	1	0	0	1	0	0	1	1	1	1	2	0	25	0	0	0
G1	2	34	0	0	0	144	27	7.32	3.34	329.6	46.8	124.32	1.07	1	1	6.06	0.9	1	0	0	0	1	0	0	1	1	0	1	0	2	1	0	0	1	1	2	0	25	0	0	0
G1	2	53	1	0	1	114	20.2	5.33	0.76	259.4	70	85.49	6.76	1	1	5.26	0.82	0	0	0	0	0	0	0	1	1	1	0	1	3	1	1	1	1	1	3	0	23	0	0	0
G0	2	69	0	0	0	127	23.3	7.07	1.12	252.5	38.6	103.58	2.81	1	1	6.21	0.74	0	0	0	0	0	0	0	1	1	1	0	1	3	1	0	1	1	1	3	0	23	0	0	0
G2	2	50	0	0	1	140	18.2	8	6.6	282.6	52.5	106.98	5.49	1	1	3.88	0.75	0	0	0	0	1	0	0	1	1	1	0	0	2	1	1	1	1	1	2	0	23	0	0	0
G2	1	59	1	1	0	131	32.9	6.14	1.77	363.5	65.1	101.16	1.41	0	1	8.05	0.99	1	0	0	0	1	0	0	1	1	0	1	1	0	0	1	0	1	0	1	1	7	0	0	1	0
G4	1	57	0	0	1	80	26.8	2.49	2.15	795.9	102.2	69.8	8.09	0	0	5.71	0.17	1	0	0	0	0	1	1	1	1	1	1	1	2	1	1	1	1	1	1	1	15	1	0	0
G2	1	55	0	1	0	118	28.4	8.09	1.9	310	64.6	104.38	2.23	1	0	5.19	1.42	1	0	0	0	0	0	0	1	1	0	0	1	0	0	0	1	1	1	3	0	21	0	0	0
G2	1	42	0	0	1	126	18	20.03	34.29	295.9	81	102.72	12.96	1	1	3.78	1.25	1	1	1	1	1	1	1	1	1	1	0	1	3	1	1	1	1	0	2	0	21	0	0	0
G2	2	72	1	0	1	134	25.9	5.47	1.91	484.4	64.1	83.21	3.81	1	1	6.94	0.94	1	0	0	0	0	0	0	1	1	0	0	1	3	1	1	1	1	1	1	1	23	0	1	0
G1	2	38	0	0	0	134	40.5	4.62	0.7	360.3	52	116.76	0.22	1	0	8.44	0.86	0	0	0	0	0	0	0	0	1	0	0	1	2	1	1	0	0	0	3	0	18	0	0	0
G3	1	67	1	1	0	96	31.5	4.27	1.35	440.4	90.9	74.96	6.83	1	1	11	0.98	1	0	0	1	1	0	0	1	1	1	0	0	2	1	1	1	1	0	1	1	18	0	1	0
G2	2	52	0	0	1	131	22.4	8.67	5.68	348.2	56.6	102.91	3.59	0	1	3.7	0.96	1	0	0	0	0	0	0	1	1	1	0	0	0	0	1	1	1	0	1	1	18	0	1	0
G1	2	54	0	0	1	149	23	10.13	3.16	365	54.2	102.93	6.68	1	1	3.95	1.04	0	0	0	0	0	0	0	1	1	1	0	0	2	1	1	1	1	1	1	1	23	0	0	0
G1	1	55	0	0	1	138	22.4	7.89	1.75	424.8	88.3	84.47	3.59	1	1	8.32	0.94	1	0	0	0	0	0	0	1	1	0	0	1	3	1	1	1	1	1	1	1	23	0	0	0
G0	1	51	1	1	0	144	30.7	6.47	1.31	390.6	56.5	113.43	1.17	1	0	7.4	0.88	0	0	0	0	0	0	0	1	1	0	0	1	0	0	0	1	1	0	3	0	20	0	0	0
G3	2	55	1	0	0	139	29.1	7.46	2.96	685	73.7	79.21	1.73	1	1	6.08	1.23	0	0	0	0	0	0	0	1	1	0	0	0	0	0	1	0	1	0	1	1	7	0	0	0
G2	1	46	0	0	0	133	28	6.64	1.1	461.9	57.2	116.89	1.87	1	1	2.47	0.78	1	0	0	0	0	0	0	1	1	1	1	1	0	0	1	1	0	0	1	1	23	0	0	1	0
G1	1	61	1	0	0	133	21.8	7.7	1.85	450.9	68	97.98	3.46	1	0	7.35	0.85	1	0	0	0	0	0	0	1	1	1	1	1	0	0	1	1	1	1	3	0	6	0	0	0
G4	2	52	0	0	0	105	20.9	9.32	0.97	435.3	72.8	82.11	2.94	1	1	4.65	0.74	1	0	0	0	0	0	0	1	1	0	0	1	0	0	1	1	1	1	1	1	9	0	0	0
G1	2	64	1	0	0	118	34.6	5.64	2.09	452.9	58.8	93.41	2.42	1	0	12.5	1.03	0	0	0	0	0	0	0	1	1	0	0	0	0	0	1	0	0	1	1	1	9	0	0	0
G1	2	53	0	0	1	137	20.5	10.79	3.32	389.4	33.5	121.44	10.52	1	1	3.97	0.99	1	0	0	0	0	0	0	1	1	1	0	1	2	1	1	0	1	1	2	0	21	0	0	0
G3	2	75	0	0	1	100	22	8.36	1.93	236.5	71.8	71.04	7.58	1	0	4.92	0.74	1	0	0	0	0	0	0	1	1	1	1	1	1	1	1	1	1	1	1	1	8	0	0	0
G2	1	58	0	0	0	138	30.1	5.42	1.41	394.1	79	94.09	5.95	1	0	25.9	0.87	0	0	0	0	0	0	0	1	0	0	0	1	2	1	1	1	0	0	3	0	21	0	0	0
G1	2	54	1	0	0	124	33.1	10.54	4.12	331.2	49	106.41	15.3	1	1	6.58	1.18	0	0	0	0	0	0	0	1	1	1	0	1	2	1	1	1	1	1	2	0	21	0	0	0
G1	1	45	0	0	1	137	18	10.7	2.44	438.2	68.3	109.44	3.94	1	1	4.06	0.86	0	0	0	0	0	0	0	1	1	0	0	1	2	1	1	1	1	1	3	0	20	0	0	0
G1	1	57	1	0	0	164	24.6	6.84	1.42	382.2	58	107.58	1.45	1	1	3.55	0.93	0	0	0	0	0	0	0	1	1	0	0	0	0	0	1	1	1	1	1	1	13	0	1	0
G1	1	52	0	0	0	153	22.1	7.5	1.47	412	65	106.33	2.59	1	1	6.51	0.92	0	0	0	0	0	0	0	1	1	1	0	0	2	1	1	1	1	0	1	1	19	0	0	0
G2	2	65	1	0	1	109	19.1	14.52	5.36	200.7	69.9	78.72	7.83	1	1	6.51	0.86	0	0	0	0	0	0	0	1	1	0	1	1	2	1	1	1	1	1	2	0	16	0	0	0
G2	2	32	0	0	1	117	27.1	8.41	2.14	350.7	34.1	139.92	4.37	0	1	5.62	0.98	0	0	0	0	0	0	0	1	1	0	0	1	2	1	1	0	1	1	2	0	19	0	0	0
G0	2	48	1	0	1	125	26.1	4.25	2.51	377.8	53.2	108.02	6.64	1	1	6.62	0.9	0	0	0	0	0	0	0	1	1	1	0	1	2	1	1	1	1	1	3	0	19	0	0	0
G1	1	37	0	0	0	148	31.8	6.85	7.84	496.2	58.9	123.03	3.59	1	0	9.64	1.46	0	0	0	0	0	0	0	1	1	0	0	0	0	0	1	0	1	0	2	0	12	0	0	0
G2	2	63	1	1	0	122	30.3	4.51	1.67	238.8	57.3	94.88	0.83	1	1	8.23	0.75	1	0	0	0	0	0	0	1	1	0	0	0	2	1	1	1	0	1	1	1	19	0	0	0
G3	2	58	1	0	1	127	29.7	6.83	6.72	337.5	55.5	99.3	5.31	0	1	4.6	0.9	0	0	0	0	0	0	0	1	1	1	1	0	2	1	1	1	1	0	3	0	16	0	0	0
G2	2	49	0	0	0	119	30.9	9.07	2.4	317.5	46.4	112.2	0.68	0	1	6.31	1.08	1	0	0	0	0	0	0	1	1	1	0	1	2	1	0	1	1	0	2	0	11	0	0	0
G2	2	37	0	0	0	100	22.4	3.59	1.86	194.8	37.6	130.82	1.46	1	0	27.5	0.58	0	0	0	0	0	0	0	1	1	1	1	1	2	1	0	1	0	0	1	1	7	0	0	0
G2	1	42	0	0	1	146	24.9	6.01	1.09	468.2	94.5	85.26	7.67	1	1	4.9	0.98	1	0	0	0	0	0	0	1	1	0	0	1	2	1	1	0	1	0	1	1	17	0	0	0
G2	1	56	0	0	1	156	22	8.22	2.65	375.8	74	98.02	8.75	1	0	5.3	0.98	0	0	0	0	0	0	0	0	1	0	0	1	2	1	0	1	1	1	3	0	11	0	0	0
G3	1	60	1	0	0	112	27.2	4.01	1.56	366.8	70.3	97.33	3	0	0	21.8	1.1	1	1	1	1	1	0	0	1	1	0	1	0	0	0	1	1	1	0	3	0	18	0	0	0
G2	2	72	1	0	0	111	30.8	8.13	1.12	486.2	64.3	82.9	2.2	0	0	10.3	1.04	1	0	0	0	0	0	0	1	1	0	0	0	0	0	1	1	1	0	1	1	10	0	0	0
G2	1	49	0	1	1	152	26.2	7.43	3.06	363.8	59	113.01	6.13	1	1	6.12	0.95	1	0	0	1	0	0	0	1	1	0	0	1	2	1	1	1	1	0	2	0	14	0	0	0
G1	2	40	0	0	0	128	30.8	10.9	1.13	284.7	42.5	123.03	2.98	0	1	7.07	0.98	1	0	0	0	0	0	0	1	1	1	1	1	2	1	1	1	1	0	1	1	12	0	0	0
G2	1	67	0	0	0	134	22.2	12.15	1.41	423.3	119.9	53.64	2.85	1	1	3.28	0.93	1	1	1	1	1	0	0	1	1	1	1	1	2	1	1	1	1	0	1	1	6	0	1	0
G1	1	53	1	0	0	148	38.2	3.63	2.06	272.1	75.9	99.07	6.07	0	0	6.4	0.98	0	0	0	0	0	0	0	1	1	1	0	1	2	1	1	1	1	0	3	0	14	0	0	0
G2	1	63	1	0	1	136	17.7	8.25	11.49	337	102.7	66.52	14.5	1	1	3.36	0.75	1	0	0	0	0	0	0	1	1	1	0	1	1	1	1	1	1	1	2	0	12	0	1	0
G1	1	44	1	0	0	147	33.2	3.68	1.85	392.3	53	122.32	1.78	0	1	10.5	1.02	0	0	0	0	0	0	0	1	1	0	0	0	0	0	1	1	1	0	1	1	7	0	0	0
G1	1	50	0	0	0	124	36.3	7.4	4.1	451.5	74.3	102.07	0.22	0	0	0.66	0.88	0	0	0	0	0	0	0	1	1	0	0	1	2	1	1	1	1	0	3	0	6	0	0	0
G3	1	71	1	0	0	136	33.8	7.43	1.4	396.4	63.3	94.06	1.67	0	0	9.24	1.03	1	0	0	0	0	0	0	1	1	1	1	0	0	0	1	1	1	0	1	1	15	0	0	0
G2	2	54	1	0	0	107	21.7	9.73	3.88	235	65	92.85	3.05	1	1	4.28	0.77	1	0	0	0	0	0	0	1	1	1	0	1	1	1	1	1	1	0	2	0	16	0	0	0
G3	2	58	1	1	1	117	24.9	6.87	9.45	483.5	46.8	105.03	8.46	1	1	3.3	0.88	1	0	0	1	1	0	0	1	1	1	0	0	2	1	1	1	1	1	1	1	17	0	0	0
G1	2	36	0	0	1	127	25.8	4.45	1.36	377.7	49.3	120.51	4.73	0	1	6.07	0.6	0	0	0	0	0	0	0	1	1	1	0	1	2	1	1	1	1	0	3	0	17	0	0	0
G2	2	78	1	0	1	108	21.3	8.74	2.15	423.7	58	85.05	3.89	0	1	14.3	0.68	1	0	0	0	0	0	0	1	1	1	0	1	2	1	1	1	1	1	3	0	10	0	0	0
G2	2	55	1	0	1	143	26.4	6.18	1.41	443	40.4	112.59	11.18	0	1	10.6	0.9	0	0	0	0	0	0	0	1	1	1	0	0	2	1	1	1	1	1	1	1	16	0	1	0
G2	1	63	1	0	0	123	32.3	5.87	0.89	507.6	62	100.35	6.52	1	1	8.44	10.1	1	0	0	0	0	0	0	1	1	1	0	1	3	1	1	1	1	0	2	0	16	0	0	0
G2	1	58	1	0	1	141	20.1	6.49	2.44	488.6	65.1	101.88	7.23	1	1	3.69	1.18	0	0	0	0	0	0	0	1	1	1	0	1	2	1	1	1	1	1	2	0	16	0	0	0
G0	1	27	0	0	1	154	23	11.83	2.52	360.6	65.9	126.03	8.96	0	0	1.93	1.31	0	0	0	0	0	0	0	1	1	0	0	0	2	1	1	1	1	0	3	0	16	0	0	0
G1	2	65	1	1	0	139	22.7	7.01	2.62	376.8	47.2	99.71	0.86	1	1	13.1	1.11	0	0	0	0	0	0	0	1	1	1	0	0	0	0	1	1	1	0	1	1	16	0	0	0
G3	2	65	0	0	1	125	25.7	7.49	1.38	422.8	70.9	77.38	3.59	1	1	3.79	0.83	1	0	0	0	0	0	0	1	1	1	0	1	2	1	0	1	1	1	1	1	16	0	0	1	1
G1	1	31	0	0	0	159	19.9	10.52	2.14	524.2	54.9	132.09	2.75	1	0	2.61	0.67	0	0	0	0	0	0	0	1	1	1	0	1	2	1	1	1	1	1	1	1	16	0	0	0
G2	1	58	1	1	0	151	33.9	4.66	2.42	587.9	61.9	104.01	12.84	1	1	8.06	1.08	1	0	0	0	0	0	0	1	1	1	0	0	0	0	1	1	1	1	3	0	16	0	0	0
G3	1	62	1	0	0	158	22.8	6.6	1.75	395.5	65.7	98.68	1.08	1	1	6.89	0.67	1	0	0	0	0	0	0	1	1	1	1	0	2	1	1	1	1	1	1	1	15	0	1	0
G0	2	57	0	0	0	152	30.7	10.37	1.22	392.9	58	98.56	1.67	1	1	6.23	0.9	0	0	0	0	0	0	0	1	1	1	1	0	2	1	1	1	1	1	2	0	15	0	0	0
G2	1	74	1	0	0	74	26.8	4.41	1.23	506.4	87.8	74.42	0.27	0	0	25.9	0.91	1	0	0	0	1	0	0	1	1	0	1	0	0	0	0	1	0	1	1	1	12	0	1	0
G2	1	74	0	0	0	138	23	5.37	1.48	371.1	83	79.66	3.36	1	0	5.51	0.94	1	0	0	0	1	0	0	1	1	1	1	0	2	1	1	1	1	1	1	1	14	0	1	1	0
G1	2	44	0	0	0	144	35.6	4.1	5.25	389.7	46.3	116.3	2.32	1	1	8.67	1.15	1	0	0	0	1	0	0	1	1	1	0	0	3	1	1	1	1	0	2	0	14	0	0	0
G1	1	69	1	1	1	111	18.6	14.79	5.24	427.5	132.4	46.91	5.36	1	0	2.1	0.82	1	0	0	0	1	0	0	1	1	1	1	0	2	1	1	1	1	1	2	0	14	0	0	0
G2	1	17	0	0	0	116	33.8	4.78	1.02	509.1	97.1	98.34	4.6	1	0	3.82	0.74	0	0	0	0	0	0	0	0	1	1	0	1	0	0	1	1	0	0	3	0	10	0	0	0
G3	2	48	0	0	0	141	31.3	6.56	9.26	306	37.9	120.77	1.9	1	1	7.05	0.58	0	0	0	0	0	0	0	1	1	1	1	0	0	0	1	0	0	0	1	1	14	0	0	0
G2	1	55	1	0	1	168	20.4	11.52	6.95	605.6	54.3	112.1	6.38	1	1	2.91	0.84	1	0	0	0	0	0	0	1	1	0	1	0	0	0	0	1	1	1	2	0	13	0	0	0
G4	2	66	1	1	1	105	22.8	4.42	1.8	356.2	98.2	68.76	6.52	1	1	9	0.8	1	0	0	0	1	0	0	1	1	1	1	0	2	1	0	1	1	1	1	1	7	0	1	1	0
G2	1	59	1	1	0	125	31.3	3.66	0.96	578.2	84.8	86.25	1.45	1	0	7.01	0.68	1	0	0	0	0	0	0	1	1	1	0	1	2	1	1	0	1	0	3	0	8	0	0	1	1
G4	2	70	1	0	1	99	21	8.04	3.62	216.9	193.7	22.16	5.74	1	1	4.56	0.73	0	0	0	0	0	1	1	1	1	1	0	1	0	0	1	1	1	1	2	0	6	1	0	0
G1	1	62	0	0	0	136	29.8	7.37	2.13	491.6	61.7	101.26	0.48	1	1	8.56	0.94	0	0	0	0	0	0	0	1	1	0	0	0	0	0	1	1	0	0	1	1	10	0	0	0
G2	1	43	0	0	1	157	16.4	7.36	2.77	591.4	71	109.23	7.65	1	1	3.07	0.8	0	0	0	0	0	0	0	1	1	1	0	1	2	1	0	1	1	1	1	1	12	0	0	1	1
G2	1	33	1	0	1	150	28.6	8.37	3.38	523.2	98	86.91	5.41	0	1	4.52	0.89	0	0	0	0	0	0	0	1	1	1	0	0	0	0	1	1	1	0	2	0	10	0	0	0
G1	2	58	0	0	1	91	15.8	15.07	3.8	396	88	62.59	5.82	1	0	6.81	0.76	0	0	0	1	0	0	0	1	1	1	1	1	2	1	0	1	1	1	1	1	7	0	0	0
G2	1	59	0	0	1	146	21.7	6.68	3.22	275.1	85	86	21.42	1	1	3.9	0.78	0	0	0	0	0	0	0	1	1	1	1	1	1	1	1	1	1	0	1	1	9	0	0	0
G0	1	27	0	0	0	154	39.9	5.87	1.6	283.2	116	73.94	1.68	0	0	8.97	1	0	0	0	0	0	0	0	0	0	0	0	1	2	1	1	1	1	0	2	0	7	0	0	0
G3	2	33	0	0	0	145	35.4	4.23	2.97	363.1	54	119.44	0.78	0	0	17.2	0.97	1	0	0	0	0	1	1	1	1	1	0	0	0	0	1	0	0	0	1	1	12	0	0	0
G1	1	56	0	0	0	106	35	8.34	0.79	504.8	82	91.73	0.85	0	1	5.58	0.63	0	0	0	0	0	0	0	1	1	1	0	0	0	0	1	1	1	0	1	1	11	0	0	1	1
G1	1	50	0	0	1	131	23.6	9.16	1.73	432.1	93	82.17	3.94	1	1	7.05	0.85	1	0	0	0	0	0	0	1	1	1	0	0	0	0	1	1	1	1	3	0	10	0	0	0
G2	1	42	1	0	1	155	27.1	8.62	2.72	419.5	97	82.61	6	0	1	4.32	1.03	1	0	0	0	0	1	1	1	1	0	1	0	2	1	1	0	1	0	1	1	6	0	0	0
G1	1	35	0	0	0	140	37.6	4.58	0.64	423.1	83	104.77	0.57	1	0	8.73	0.65	0	0	0	0	0	0	0	1	1	1	0	0	0	0	1	1	0	0	2	0	6	0	0	0
G2	1	50	1	0	0	117	32	6.48	2.49	327.3	184	36.01	8.88	1	0	7.46	0.67	1	0	0	1	0	0	0	1	1	1	1	1	1	1	1	1	1	0	2	0	9	0	0	0
G3	2	60	1	1	1	112	18.1	9.65	2.4	274.9	139	35.51	8.49	1	0	4.92	0.85	1	0	0	0	1	0	0	1	1	1	1	0	2	1	1	1	1	1	1	1	8	0	0	1	1
G1	1	47	0	0	0	139	18.4	5.82	1.02	464.7	74	104.42	1.25	1	1	19	0.87	0	0	0	0	0	0	0	1	1	1	0	1	2	1	1	1	0	1	3	0	10	0	0	0
G2	1	32	1	0	1	158	19.3	12.87	6.98	354	172	44.34	20.1	1	0	2.94	0.96	1	1	1	0	1	1	1	1	1	0	0	1	2	1	0	1	1	1	2	0	10	0	1	1	1
G2	2	60	1	0	0	114	26.1	4.43	1.08	325	57	97.06	2.2	1	1	7.26	0.68	1	0	0	0	0	0	0	1	1	1	0	1	2	1	1	1	1	0	3	0	9	0	0	0
G2	1	58	1	0	1	133	26.8	9.81	4.43	477.1	116	59.47	8.54	1	0	6.01	0.88	1	0	0	0	0	1	1	1	1	1	1	1	2	1	1	1	1	1	1	1	10	0	0	1	1
G0	1	25	0	0	0	161	36.3	4.9	1.14	513.2	81	115.75	1.22	1	0	8.34	0.73	0	0	0	0	0	0	0	1	1	1	0	1	2	1	1	1	1	0	2	0	6	0	0	0
G2	1	56	1	0	0	258	21.2	7.23	5.11	310.1	76	96.95	1.78	1	1	5.17	1.05	1	0	0	0	0	0	0	1	1	1	0	0	2	1	1	1	1	1	2	0	9	0	0	0
G2	2	32	0	0	0	115	36.7	4.55	0.75	216.9	54	119.44	9.28	0	0	3.92	0.72	1	1	1	1	1	1	1	1	1	1	0	1	2	1	1	1	1	1	2	0	9	0	1	1	1
G1	1	67	0	0	0	105	29	6.78	1.76	346	80	87.87	2.15	1	0	10.7	1.17	1	0	0	0	0	0	0	1	1	0	0	0	0	0	1	1	1	0	1	1	9	0	0	0
G3	1	52	1	0	0	105	21.1	4.49	0.89	491	144	47.76	1.67	1	1	12.6	0.85	0	0	0	0	0	0	0	1	1	1	1	1	2	1	1	1	1	1	3	0	9	0	0	0
G1	1	63	1	0	1	122	16.8	7.94	3.22	446.3	80	90.37	9.74	1	1	2.7	0.77	1	0	0	0	0	0	0	1	1	0	0	1	2	1	1	1	1	1	2	0	9	0	0	0
G2	2	34	0	0	0	142	47.2	5.35	0.89	254.8	49	114.15	3.99	0	0	16.6	1.58	1	0	0	0	0	0	0	0	1	1	1	1	2	1	1	1	1	0	1	1	8	0	0	0
G1	1	32	0	0	0	156	27.1	7.46	1.96	356.9	74	116.02	2.41	0	1	6.99	0.96	1	0	0	0	0	0	0	1	1	1	0	1	2	1	1	1	1	0	2	0	9	0	0	0
G3	1	41	1	0	1	167	19.4	9.08	2.38	256.3	100	80.18	12.66	1	1	2.96	0.75	0	0	0	0	0	1	1	1	1	1	0	1	2	1	1	1	1	0	3	0	9	0	0	0
G2	1	71	1	0	1	110	24.4	8.87	1.45	337	60	96.16	5.99	0	1	21.9	0.83	0	0	0	0	0	0	0	1	1	0	0	1	2	1	1	1	0	0	3	0	6	0	0	0
G1	1	48	1	0	1	173	22.8	12.7	1.56	365	86	91.6	12.53	1	1	2.77	1.01	1	0	0	0	0	0	0	1	1	0	0	1	2	1	1	1	1	1	3	0	8	0	0	1	1
G1	2	37	0	0	1	136	16.6	7.77	1.06	238.9	49	119.9	6.19	1	0	3.67	0.77	1	0	0	0	0	0	0	0	1	1	0	0	2	1	0	1	1	0	2	0	7	0	0	1	1
G0	2	30	0	0	0	118	26.3	14.48	1.68	381.2	40	134.64	0.81	1	1	4.46	0.71	0	0	0	0	0	0	0	1	1	1	0	0	0	0	1	1	1	0	2	0	6	0	0	0
G2	1	52	1	0	1	123	23.7	7.17	5.82	369	92	82.09	7.19	1	1	4.45	0.97	0	0	0	0	0	0	0	0	1	0	0	0	0	0	1	1	1	0	1	1	7	0	0	0
G1	2	40	0	0	1	121	22.4	5.54	1.64	326.1	51	115.87	5	1	1	5.35	1.03	0	0	0	0	0	0	0	1	1	1	0	1	0	0	1	1	0	0	2	0	6	0	0	1	1
G1	2	43	0	0	1	136	24.5	7.54	2.53	285	58	108.75	5.92	1	1	6.49	0.69	1	0	0	0	0	0	0	1	1	1	0	1	2	1	0	1	1	1	2	0	6	0	0	0
G1	1	53	1	0	1	106	16.8	7.12	1.12	345	98	75.52	4.23	1	1	3.5	1.06	0	0	0	0	0	1	1	1	1	1	0	0	0	0	1	1	1	1	2	0	6	0	0	0
G1	2	38	0	0	1	143	23.6	6.59	6.16	414.8	55	114.62	7.56	0	1	3.2	1.03	1	0	0	0	0	0	0	1	1	1	1	1	2	1	1	1	1	1	2	0	6	0	0	0
G2	1	55	0	0	1	145	24.5	10.86	1.17	321	87	86	6.29	1	1	8.72	0.85	0	0	0	0	0	0	0	1	1	1	1	1	1	1	1	0	1	0	2	0	6	0	0	0
